# Supplementary material
Source: Research Square preprint supplement (doi:10.21203/rs.3.rs-9313883/v1)
Supplement: Supplementary file 1 [file 05269204f57d25c4ce7de6a0.docx]

### Article title: Holistic compression model to predict post-stroke mood at 6 months

### Journal name: Brain Structure and Function

### Author names: Suhrit Duttagupta, Michel Thiebaut de Schotten, Thomas Tourdias, Olivier Godefroy, Sylvie Berthoz, Igor Sibon

### Affiliation and e-mail address of the corresponding author: Univ. Bordeaux, INCIA UMR 5287, Bordeaux, France 33000; suhritdgupta@gmail.com

### Supplementary Material 3: Clinical model parameters

| **BBS HAD Anxiety** | | | | | | | | |
| --- | --- | --- | --- | --- | --- | --- | --- | --- |
|  | | | | | **95% Exp(B) Confidence Interval** | |  | |
| **Names** | **Effect** | **Estimate** | **SE** | **exp(B)** | **Lower** | **Upper** | **z** | **p** |
| Intercept | Intercept | 4.5276 | 0.2696 | 92.532 | 54.555 | 156.944 | 16.80 | <.001 |
| ANX M0 | ANX M0 | 0.3492 | 0.0599 | 1.418 | 1.261 | 1.595 | 5.83 | <.001 |
| Sex | F - M | 1.1222 | 0.5506 | 3.071 | 1.044 | 9.037 | 2.04 | 0.043 |
| Age | Age | -0.0694 | 0.0186 | 0.933 | 0.900 | 0.968 | -3.74 | <.001 |

| **MOTIV-POSDEP HAD Anxiety** | | | | | | | | |
| --- | --- | --- | --- | --- | --- | --- | --- | --- |
|  | | | | | **95% Exp(B) Confidence Interval** | |  | |
| **Names** | **Effect** | **Estimate** | **SE** | **exp(B)** | **Lower** | **Upper** | **z** | **p** |
| Intercept | Intercept | 4.92003 | 0.2216 | 137.007 | 88.738 | 211.53 | 22.202 | <.001 |
| ANX M0 | ANX M0 | 0.43969 | 0.0672 | 1.552 | 1.361 | 1.77 | 6.542 | <.001 |
| Sex | F - M | 0.94456 | 0.4452 | 2.572 | 1.075 | 6.15 | 2.121 | 0.035 |
| Age | Age | -0.00653 | 0.0134 | 0.993 | 0.968 | 1.02 | -0.485 | 0.628 |

| **BBS HAD Depression** | | | | | | | | |
| --- | --- | --- | --- | --- | --- | --- | --- | --- |
|  | | | | | **95% Exp(B) Confidence Interval** | |  | |
| **Names** | **Effect** | **Estimate** | **SE** | **exp(B)** | **Lower** | **Upper** | **z** | **p** |
| Intercept | Intercept | 3.5058 | 0.2609 | 33.308 | 19.9744 | 55.541 | 13.44 | <.001 |
| Sex | F - M | 1.2129 | 0.5380 | 3.363 | 1.1717 | 9.654 | 2.25 | 0.025 |
| Age | Age | -0.0402 | 0.0182 | 0.961 | 0.9269 | 0.996 | -2.21 | 0.028 |
| DEP M0 | DEP M0 | 0.4428 | 0.0697 | 1.557 | 1.3582 | 1.785 | 6.35 | <.001 |

| **MOTIV-POSDEP HAD Depression** | | | | | | | | |
| --- | --- | --- | --- | --- | --- | --- | --- | --- |
|  | | | | | **95% Exp(B) Confidence Interval** | |  | |
| **Names** | **Effect** | **Estimate** | **SE** | **exp(B)** | **Lower** | **Upper** | **z** | **p** |
| Intercept | Intercept | 3.06187 | 0.2364 | 21.368 | 13.445 | 33.96 | 12.954 | <.001 |
| Sex | F - M | -0.38122 | 0.4752 | 0.683 | 0.269 | 1.73 | -0.802 | 0.423 |
| Age | Age | 0.00289 | 0.0145 | 1.003 | 0.975 | 1.03 | 0.199 | 0.842 |
| DEP M0 | DEP M0 | 0.72906 | 0.0921 | 2.073 | 1.731 | 2.48 | 7.914 | <.001 |

| **MOTIV-POSDEP CES-D** | | | | | | | |
| --- | --- | --- | --- | --- | --- | --- | --- |
|  | | | | **95% Exp(B) Confidence Interval** | |  | |
| **Names** | **Estimate** | **SE** | **exp(B)** | **Lower** | **Upper** | **z** | **p** |
| Intercept | 16.2404 | 0.3127 | 1.13e+7 | 6.12e+6 | 2.09e+7 | 51.93 | <.001 |
| MOCA M0 | -0.1530 | 0.1174 | 0.858 | 0.6818 | 1.08 | -1.30 | 0.194 |
| Stroke Volume | -0.0487 | 0.0429 | 0.952 | 0.8756 | 1.04 | -1.14 | 0.258 |

| **GRECOGVasc CES-D** | | | | | | | |
| --- | --- | --- | --- | --- | --- | --- | --- |
|  | | | | **95% Exp(B) Confidence Interval** | |  | |
| **Names** | **Estimate** | **SE** | **exp(B)** | **Lower** | **Upper** | **z** | **p** |
| Intercept | 12.91844 | 0.6550 | 407762.313 | 112941.98 | 1.47e+6 | 19.722 | <.001 |
| MOCA M0 | -0.07476 | 0.1125 | 0.928 | 0.744 | 1.16 | -0.665 | 0.507 |
| Stroke Volume | -0.00309 | 0.0228 | 0.997 | 0.953 | 1.04 | -0.136 | 0.892 |
