# Supplementary material
Source: Research Square preprint supplement (doi:10.21203/rs.3.rs-9313883/v1)
Supplement: Supplementary file 2 [file 319d430cfc164bec75843da6.docx]

## Article title: Holistic compression model to predict post-stroke mood at 6 months

### Journal name: Brain Structure and Function

### Author names: Suhrit Duttagupta, Michel Thiebaut de Schotten, Thomas Tourdias, Olivier Godefroy, Sylvie Berthoz, Igor Sibon

### Affiliation and e-mail address of the corresponding author: Univ. Bordeaux, INCIA UMR 5287, Bordeaux, France 33000; suhritdgupta@gmail.com

## Supplementary Material 5: RESULTS USING ADC MAPS IN THE PIPELINE

*HAD Anxiety*

|  |  | ADC version | DWI version |
| --- | --- | --- | --- |
| Training Sample | **R2** **MSE AUC** | 0.125 13.416 0.639 | 0.11 13.31 0.662 |
| Testing Sample | **R2** **MSE AUC** | 0.091 15.087 0.686 | 0.064 16.03 0.613 |
| *HAD Depression* | | |  |
| Training Sample | **R2** **MSE AUC** | 0.204  12.130  0.703 | 0.108  10.2  0.721 |
| Testing Sample | **R2** **MSE AUC** | 0.067 14.15 0.638 | 0.067 15.37 0.708 |
