# Supplementary material
Source: Research Square preprint supplement (doi:10.21203/rs.3.rs-9313883/v1)
Supplement: Supplementary file 3 [file c2be486b4ad1a550f4d78dde.docx]

## Article title: Holistic compression model to predict post-stroke mood at 6 months

### Journal name: Brain Structure and Function

### Author names: Suhrit Duttagupta, Michel Thiebaut de Schotten, Thomas Tourdias, Olivier Godefroy, Sylvie Berthoz, Igor Sibon

### Affiliation and e-mail address of the corresponding author: Univ. Bordeaux, INCIA UMR 5287, Bordeaux, France 33000; suhritdgupta@gmail.com

### SUP 2: Univariate analysis between predictors and 6-month scores

HAD Anxiety at 6 months

| Predictor | Cohort | Result |
| --- | --- | --- |
| Initial HAD Anxiety | BBS MOTIV-POSDEP | ρ=0.351, p <0.001 ρ=0.439, p <0.001 |
| Age | BBS MOTIV-POSDEP | ρ= -0.209, p=0.003 p=0.457 |
| Sex | BBS MOTIV-POSDEP | p=0.058 F > M, p=0.013 |
| mRS (Kruskal-Wallis test) | BBS MOTIV-POSDEP | p=0.677 p=0.043 |
| NIHSS | BBS MOTIV-POSDEP | p=0.499 p=0.099 |
| MOCA | BBS MOTIV-POSDEP | p=0.470 p=0.89 |
| IQCODE | BBS MOTIV-POSDEP | p=0.817 p=0.288 |
| Stroke Volume | BBS MOTIV-POSDEP | p=0.646 p=0.877 |

HAD Depression at 6 months

| Predictor | Cohort | Result |
| --- | --- | --- |
| Initial HAD Depression | BBS MOTIV-POSDEP | ρ=0.325, p = 0.002 ρ=0.457, p < 0.001 |
| Age | BBS MOTIV-POSDEP | p=0.895 p=0.275 |
| Sex | BBS MOTIV-POSDEP | F>M; p=0.028 p=0.779 |
| mRS | BBS MOTIV-POSDEP | p=0.086 p=0.704 |
| NIHSS | BBS MOTIV-POSDEP | p=0.862 p=0.125 |
| MOCA | BBS MOTIV-POSDEP | p=0.227 p=0.494 |
| IQCODE | BBS MOTIV-POSDEP | p=0.350  p=0.957 |
| Stroke Volume | BBS MOTIV-POSDEP | p=0.222 p=0.93 |

CES-D at 6 months

| Predictor | Cohort | Result |
| --- | --- | --- |
| Age | GRECOGVasc MOTIV-POSDEP | Spearman ρ= -0.227, p<0.001 Spearman ρ= 0.007, p=0.928 |
| Sex | GRECOGVasc MOTIV-POSDEP | F > M, p<0.001 p=0.302 |
| mRS | GRECOGVasc MOTIV-POSDEP | Kruskal-Wallis p=0.101 Kruskal-Wallis p=0.209 |
| NIHSS | GRECOGVasc MOTIV-POSDEP | p=0.318 p=0.692 |
| MOCA | GRECOGVasc MOTIV-POSDEP | p=0.285 Spearman ρ = -0.153, p=0.039 |
| IQCODE | GRECOGVasc MOTIV-POSDEP | p=0.112 p=0.519 |
| Stroke Volume | GRECOGVasc MOTIV-POSDEP | p=0.751 p=0.734 |

###

###

###

### 
