# Supplementary material
Source: Research Square preprint supplement (doi:10.21203/rs.3.rs-9313883/v1)
Supplement: Supplementary file 5 [file f8fb2bab737c4d0d04d10f8c.docx]

## Article title: Holistic compression model to predict post-stroke mood at 6 months

### Journal name: Brain Structure and Function

### Author names: Suhrit Duttagupta, Michel Thiebaut de Schotten, Thomas Tourdias, Olivier Godefroy, Sylvie Berthoz, Igor Sibon

### Affiliation and e-mail address of the corresponding author: Univ. Bordeaux, INCIA UMR 5287, Bordeaux, France 33000; suhritdgupta@gmail.com

## Supplementary Material 1: Intercohort comparisons

1. Kruskall-Wallis three-way comparisons

|  | χ² | p |
| --- | --- | --- |
| Age | 67.13 | <0.001 |
| Pre-stroke mRS | 59.82 | <0.001 |
| Admission NIHSS | 133.91 | <0.001 |
| Pre-stroke IQCODE | 3.34 | 0.188 |
| Admission MOCA | 115.64 | <0.001 |

(b) Dwass-Steel-Critchlow-Fligner pairwise comparisons

|  | MOTIV-POSDEP x BBS | MOTIV-POSDEP x GRECOGVasc | GRECOGVasc x  BBS |
| --- | --- | --- | --- |
| Age | 10.99 | 6.57 | 6.16 |
| <0.001 | <0.001 | <0.001 |
| Pre-stroke mRS | -2.19 | 7.07 | -9.61 |
| 0.268 | <0.001 | <0.001 |
| Admission NIHSS | -16.33 | -10.61 | -5.27 |
| <0.001 | <0.001 | <0.001 |
| Pre-stroke IQCODE | 2.278 | 2.205 | 0.196 |
| 0.241 | 0.264 | 0.990 |
| Admission MOCA | -13.95 | -12.36 | 2.12 |
| <0.001 | <0.001 | 0.290 |

Cells show coefficient W and p-values

Sex Ratio Differences:

| MOTIV-POSDEP & BBS | | |
| --- | --- | --- |
|  | Value | p |
| χ² | 0.274 | 0.601 |
| N | 390 |  |

| MOTIV-POSDEP & GreCog | | |
| --- | --- | --- |
|  | Value | p |
| χ² | 4.45 | 0.035 |
| N | 479 |  |

| BBS & GRECOGVasc | | |
| --- | --- | --- |
|  | Value | p |
| χ² | 0.463 | 0.496 |
| N | 496 |  |

Mood evaluations

| Independent Samples Mann-Whitney U | | | |
| --- | --- | --- | --- |
|  |  | **Mean difference** | **p** |
| **HAD-A M0** | BBS v MOTIV-POSDEP | <0.001 | 0.586 |
| **HAD-D M0** | BBS v MOTIV-POSDEP | 1.00 | 0.006 |
| **HAD-A M6** | BBS v MOTIV-POSDEP | -1.00 | 0.032 |
| **HAD-D M6** | BBS v MOTIV-POSDEP | <0.001 | 0.804 |
| **CES-D** | MOTIV-POSDEP v GRECOGVasc | 4.0 | <.001 |

Positive sign indicates first group > second group
